# Supplementary material for: Pigment epithelium-derived factor alleviates endothelial injury by inhibiting Wnt/β-catenin pathway
Source: PubMed Central journal article supplement (PMC5297210; doi:10.1186/s12944-017-0407-8), 2017-02-07

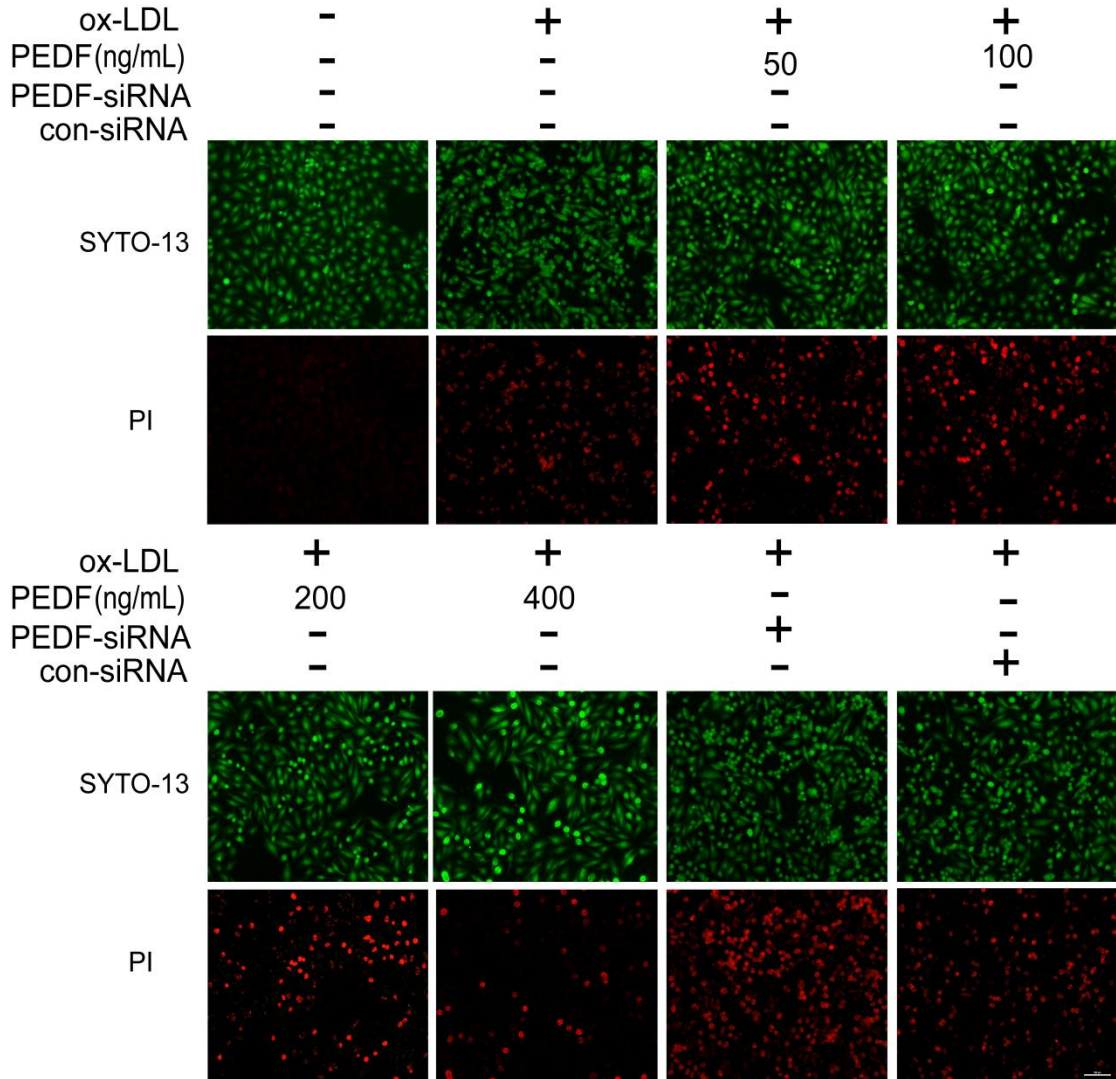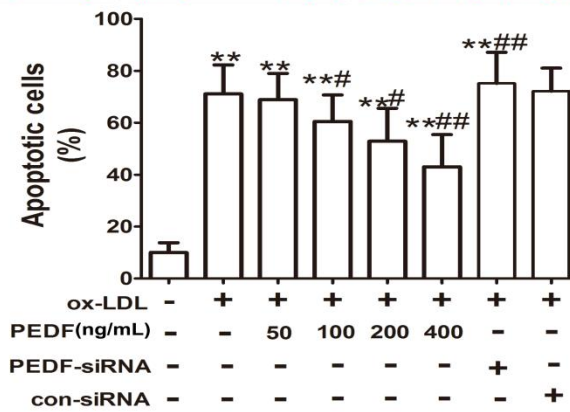

Supplement: 12944_2017_407_MOESM4_ESM.pdf [file 12944_2017_407_MOESM4_ESM.pdf]
